# Supplementary material
Source: PubMed Central journal article supplement (PMC5701867)
Supplement: NIHMS897252-supplement-3.pdf [file NIHMS897252-supplement-3.pdf]

**Table S1. Comparison of biopsied and non-biopsied donors in the overall cohort**

|                                                        | <b>Donors included in this cohort</b> | <b>Donors with biopsy, but no mention of ATI</b> | <b>Donors without biopsy</b> | <b>P-value*</b> |
|--------------------------------------------------------|---------------------------------------|--------------------------------------------------|------------------------------|-----------------|
|                                                        | <b>n=581</b>                          | <b>n=324</b>                                     | <b>n=729</b>                 |                 |
| <b>Age, years</b>                                      | 54.0 (46.0, 62.0)                     | 50.5 (40.0, 59.0)                                | 31.0 (22.0, 44.0)            | <0.001          |
| <b>Female Sex</b>                                      | 261 (45%)                             | 127 (39%)                                        | 253 (35%)                    | 0.001           |
| <b>African-American Race</b>                           | 101 (17%)                             | 57 (18%)                                         | 111 (15%)                    | 0.48            |
| <b>Admission serum creatinine, mg/dl</b>               | 1.0 (0.8, 1.3)                        | 1.0 (0.8, 1.3)                                   | 1.0 (0.8, 1.3)               | 0.8             |
| <b>Terminal serum creatinine, mg/dl</b>                | 1.1 (0.8, 1.7)                        | 1.0 (0.7, 1.4)                                   | 0.9 (0.7, 1.2)               | <0.001          |
| <b>AKI<sup>^</sup></b>                                 | 230 (40%)                             | 96 (30%)                                         | 138 (19%)                    | <0.001          |
| <b>Urine output, ml.h<sup>-1</sup>.kg<sup>-1</sup></b> | 1.6 (1.0, 2.8)                        | 1.5 (0.9, 2.2)                                   | 2.2 (1.3, 3.5)               | <0.001          |
| <b>Diabetes</b>                                        | 86 (15%)                              | 40 (12%)                                         | 11 (2%)                      | <0.001          |
| <b>Hypertension</b>                                    | 355 (61%)                             | 151 (47%)                                        | 83 (11%)                     | <0.001          |
| <b>BMI, kg/m<sup>2</sup></b>                           | 28.5 (24.5, 34.1)                     | 28.3 (24.2, 32.4)                                | 25.7 (22.7, 29.7)            | <0.001          |
| <b>Vasopressor use</b>                                 | 462 (80%)                             | 283 (87%)                                        | 589 (81%)                    | 0.01            |

Values are median (interquartile range) or n (%).

\*ANOVA test or Chi2 test

<sup>^</sup>AKI defined as SCr rise  $\geq 0.3$  mg/dl or  $\geq 50\%$  during hospitalization.

ATI: acute tubular injury, AKI: acute kidney injury, BMI: body mass index
