# Supplementary material
Source: PubMed Central journal article supplement (PMC5701867)
Supplement: NIHMS897252-supplement-4.pdf [file NIHMS897252-supplement-4.pdf]

**Table S2. Concordance between ATI reports for kidneys from the same donor**

|                |            | Right Kidney |          |            |         |       |
|----------------|------------|--------------|----------|------------|---------|-------|
|                |            | No ATI*      | Mild ATI | Severe ATI | Missing | Total |
| Left<br>Kidney | No ATI     | 406          | 5        | 5          | 6       | 422   |
|                | Mild ATI   | 6            | 82       | 5          | 1       | 94    |
|                | Severe ATI | 1            | 8        | 36         | 2       | 47    |
|                | Missing    | 14           | 4        | 0          | 0       | 18    |
|                | Total      | 427          | 99       | 46         | 9       | 581   |

ATI, Acute Tubular Injury. Severe ATI includes both moderate and severe ATI according to the pathology report. Agreement between right and left reports was 95% [expected 60%, Kappa 0.87 (P<0.001); calculated when reports were available in both kidneys (n=554)].

\*Donors were reclassified into the higher ATI grade for all other study analyses in cases of disagreement between the right and left kidneys.
