# Supplementary material
Source: PubMed Central journal article supplement (PMC5701867)
Supplement: NIHMS897252-supplement-6.pdf [file NIHMS897252-supplement-6.pdf]

**Table S4. Traditional biomarker levels in donors with SCr-based AKI**

| <b>Biomarker</b>                                           | <b>No ATI (n=165)</b> | <b>Mild ATI (n=36)</b> | <b>Severe ATI (n=29)</b> | <b>P-value<sup>^</sup></b> |
|------------------------------------------------------------|-----------------------|------------------------|--------------------------|----------------------------|
| <b>Urine Output (ml.kg<sup>-1</sup>.hour<sup>-1</sup>)</b> | 1.6 (0.9, 2.5)        | 1.5 (1.1, 2.7)         | 1.5 (0.9, 2.4)           | 0.51                       |
| <b>FENa (%)</b>                                            | 2.1 (0.5, 4.8)        | 1.9 (0.6, 5.0)         | 3.2 (0.8, 6.6)           | 0.06                       |
| <b>FEUrea (%)</b>                                          | 45.7 (33.0, 58.2)     | 41.9 (30.2, 57.0)      | 54.5 (39.5, 61.8)        | 0.85                       |
| <b>BUN to SCr ratio</b>                                    | 12.9 (10.0, 17.1)     | 13.0 (10.5, 17.1)      | 12.0 (10.6, 17.6)        | 0.33                       |

Values are median (IQR). Severe ATI includes moderate and severe ATI. ATI, Acute Tubular Injury; SCr, serum creatinine; FENa, fractional excretion of sodium; FEUrea, fractional excretion of urea; BUN, blood urea nitrogen.

<sup>^</sup>Anova Test. AKI defined as SCr rise  $\geq 0.3$  mg/dl or  $\geq 50\%$  during hospitalization
