# Supplementary material
Source: PubMed Central journal article supplement (PMC5701867)
Supplement: NIHMS897252-supplement-7.pdf [file NIHMS897252-supplement-7.pdf]

**Table S5. Performance indices of injury biomarkers to diagnose histological ATI adjusting for urine creatinine and specific gravity**

| Biomarker                                           | Severe vs. No ATI | Any vs. No ATI    |
|-----------------------------------------------------|-------------------|-------------------|
|                                                     | AUC (95% CI)      |                   |
| <b>Model 1. Adjusted for urine creatinine</b>       |                   |                   |
| <b>NGAL</b>                                         | 0.67 (0.60, 0.74) | 0.60 (0.55, 0.66) |
| <b>L-FABP</b>                                       | 0.61 (0.54, 0.68) | 0.57 (0.51, 0.62) |
| <b>IL-18</b>                                        | 0.53 (0.45, 0.60) | 0.53 (0.48, 0.59) |
| <b>KIM-1</b>                                        | 0.56 (0.48, 0.64) | 0.53 (0.48, 0.59) |
| <b>Model 2. Adjusted for urine specific gravity</b> |                   |                   |
| <b>NGAL</b>                                         | 0.67 (0.60, 0.74) | 0.61 (0.55, 0.66) |
| <b>L-FABP</b>                                       | 0.61 (0.54, 0.68) | 0.57 (0.51, 0.62) |
| <b>IL-18</b>                                        | 0.54 (0.46, 0.62) | 0.55 (0.50, 0.61) |
| <b>KIM-1</b>                                        | 0.53 (0.45, 0.61) | 0.55 (0.50, 0.61) |

Values are C-statistics (corresponding to the area under the receiver-operating characteristic curve) and 95% confidence interval. Any ATI includes mild, moderate and severe ATI. Severe ATI includes moderate and severe ATI. ATI, Acute Tubular Injury; NGAL, neutrophil gelatinase-associated lipocalin; L-FABP, liver-fatty acid binding protein; IL-18, interleukin-18; KIM-1, kidney injury molecule 1
