# Supplementary material
Source: PubMed Central journal article supplement (PMC5701867)
Supplement: NIHMS897252-supplement-8.pdf [file NIHMS897252-supplement-8.pdf]

**Table S6. Biomarker levels in the sub-group of donors without AKI but with histological diagnosis of ATI (Subclinical ATI)**

| <b>Biomarker<br/>N=326</b> | <b>No ATI<br/>N=239</b> | <b>Mild ATI<br/>N=59</b> | <b>Severe ATI<br/>N=28</b> | <b>P-value<sup>^</sup></b> |
|----------------------------|-------------------------|--------------------------|----------------------------|----------------------------|
| <b>NGAL (ng/mL)</b>        | 26.1 (9.8, 75.8)        | 36.6 (9.4, 128.4)        | 79.5 (22.7, 209.5)         | 0.02                       |
| <b>L-FABP<br/>(ng/mL)</b>  | 9.0 (3.2, 34.8)         | 11.8 (2.8, 56.4)         | 25.6 (6.4, 64.0)           | 0.23                       |
| <b>IL-18 (pg/mL)</b>       | 41.0 (20.0, 100.2)      | 40.5 (18.9, 84.6)        | 59.9 (25.8, 98.7)          | 0.40                       |
| <b>KIM-1 (ng/mL)</b>       | 1.4 (0.7, 3.1)          | 1.5 (0.9, 3.0)           | 1.4 (0.9, 4.5)             | 0.42                       |

This is the subgroup of donors that excludes those with terminal serum creatinine  $\geq 1.5$  mg/dl. AKI defined as SCr rise  $\geq 0.3$  mg/dl or  $\geq 50\%$  during hospitalization. Values are median (IQR). NGAL, neutrophil gelatinase-associated lipocalin; L-FABP, liver-fatty acid binding protein; IL-18, interleukin-18; KIM-1, kidney injury molecule 1; ATI, Acute Tubular Injury. Severe ATI includes moderate and severe ATI. <sup>^</sup>Anova test
