# Supplementary material
Source: PubMed Central journal article supplement (PMC5701867)

Fig S1. Flowchart of patients included for final analysis (STARD flow diagram)

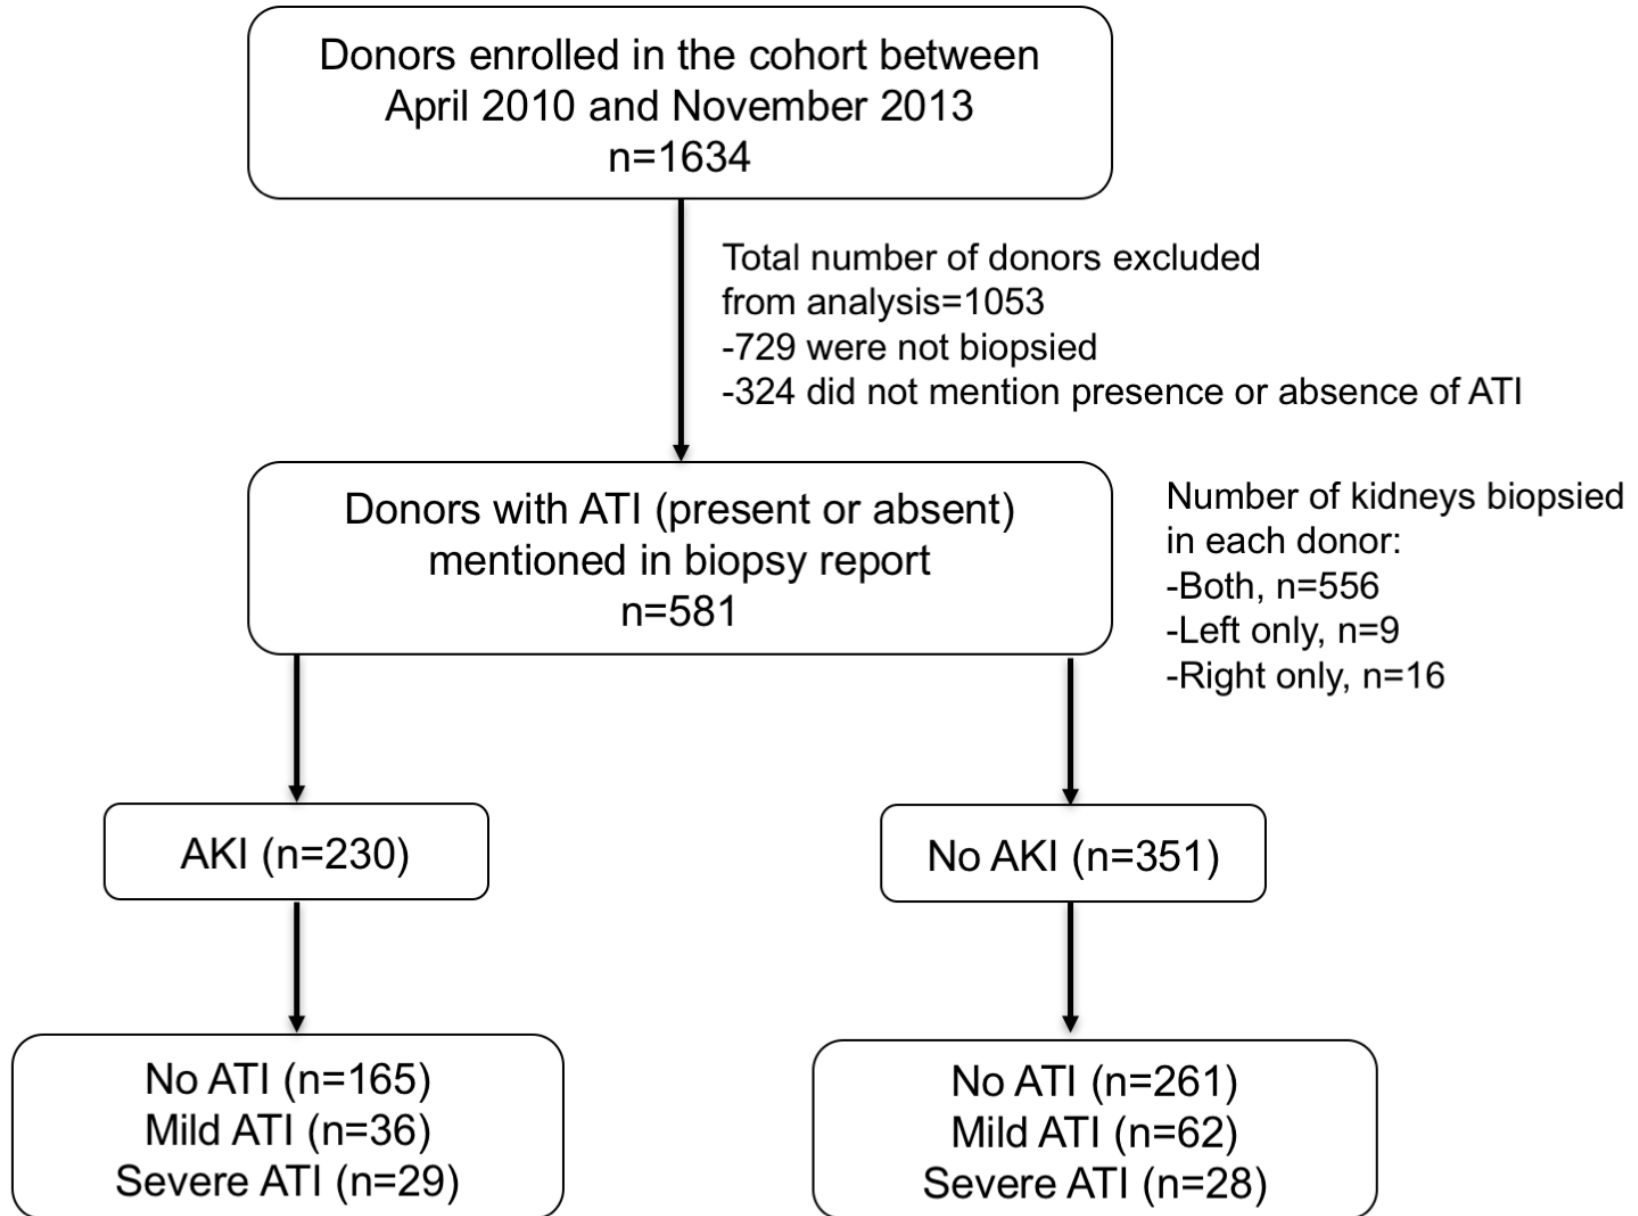

Supplement: NIHMS897252-supplement-1.pdf [file NIHMS897252-supplement-1.pdf]
